# Supplementary material
Source: publisher site journal article supplement (https://www.spandidos-publications.com/7471/downloadSupplementary)
Supplement: Supplementary file 1 [file downloadSupplementary]

## Sheet: KEGG
Table SXII. The results of Kyoto Encyclopedia of Genes and Genomes analysis for 467 differentially expressed genes between the low- and high-expression groups of DEPP1.
	ID	Description	GeneRatio	BgRatio	pvalue	p.adjust	qvalue	geneID	Count
hsa04972	hsa04972	Pancreatic secretion	16/204	102/8145	3.79251e-09	6.20208e-07	5.30092e-07	50487/22802/9635/5407/5319/1358/1357/63036/1056/5408/107/5644/5406/23436/108/51032	16
hsa04975	hsa04975	Fat digestion and absorption	11/204	43/8145	5.30092e-09	6.20208e-07	5.30092e-07	4547/335/338/337/50487/5407/1208/5319/1056/5408/5406	11
hsa04080	hsa04080	Neuroactive ligand-receptor interaction	28/204	362/8145	8.32313e-08	6.49204e-06	5.54875e-06	2742/2147/2557/57152/796/4295/80763/2897/114131/6869/5644/2834/2641/116/5697/799/183/3952/147/1141/155/9568/2922/887/2899/1081/7432/134864	28
hsa05150	hsa05150	Staphylococcus aureus infection	13/204	96/8145	6.75552e-07	3.95198e-05	3.37776e-05	1828/3866/3857/3859/390792/1671/125115/1673/3860/2266/3861/192666/1670	13
hsa04979	hsa04979	Cholesterol metabolism	9/204	50/8145	3.345e-06	0.000156546	0.0001338	336/345/1581/335/8435/338/337/4036/350	9
hsa04915	hsa04915	Estrogen signaling pathway	13/204	138/8145	3.91937e-05	0.00152855	0.00130646	3866/3857/810/3859/390792/51806/125115/3860/3861/192666/107/108/9568	13
hsa04977	hsa04977	Vitamin digestion and absorption	5/204	24/8145	0.000270488	0.00904204	0.00772824	335/338/337/5948/5406	5
hsa04727	hsa04727	GABAergic synapse	9/204	89/8145	0.00036516	0.0104494	0.00893107	9001/51764/2557/107/773/10991/108/9568/2572	9
hsa04950	hsa04950	Maturity onset diabetes of the young	5/204	26/8145	0.000401898	0.0104494	0.00893107	6514/4760/5078/222546/3175	5
hsa03320	hsa03320	PPAR signaling pathway	8/204	75/8145	0.000539977	0.012567	0.010741	336/345/1581/335/116519/5346/2167/9370	8
hsa04971	hsa04971	Gastric acid secretion	8/204	76/8145	0.000590758	0.012567	0.010741	810/495/51806/496/2520/107/108/887	8
hsa04974	hsa04974	Protein digestion and absorption	9/204	103/8145	0.00106679	0.0208023	0.0177798	1299/1280/5222/1358/1357/63036/5644/23436/51032	9
hsa04610	hsa04610	Complement and coagulation cascades	8/204	85/8145	0.00124452	0.0224013	0.0191464	462/2147/2244/731/2266/730/5104/3053	8
hsa04911	hsa04911	Insulin secretion	8/204	86/8145	0.00134325	0.0224515	0.0191894	6514/107/2641/108/116/6616/6833/9699	8
hsa04924	hsa04924	Renin secretion	7/204	69/8145	0.00161562	0.0252036	0.0215415	810/22802/51806/9635/116/183/155	7
hsa04270	hsa04270	Vascular smooth muscle contraction	10/204	134/8145	0.00191218	0.0279657	0.0239023	810/123745/50487/51806/796/5319/107/108/183/147	10
hsa04724	hsa04724	Glutamatergic synapse	9/204	114/8145	0.00217583	0.0299497	0.0255981	51764/123745/246213/2897/107/773/10991/108/2899	9
hsa04923	hsa04923	Regulation of lipolysis in adipocytes	6/204	56/8145	0.00262469	0.034121	0.0291632	107/108/5346/155/2167/1081	6
hsa04721	hsa04721	Synaptic vesicle cycle	7/204	78/8145	0.00327486	0.0403325	0.0344722	6532/246213/6571/773/6570/6616/6572	7
hsa04927	hsa04927	Cortisol synthesis and secretion	6/204	65/8145	0.00554616	0.0618861	0.0528941	3283/3777/107/108/183/3739	6
hsa00591	hsa00591	Linoleic acid metabolism	4/204	29/8145	0.00555388	0.0618861	0.0528941	246/123745/50487/5319	4
hsa00830	hsa00830	Retinol metabolism	6/204	68/8145	0.00690967	0.0734938	0.0628152	10720/6121/131/316/1551/124	6
hsa04726	hsa04726	Serotonergic synapse	8/204	115/8145	0.00809713	0.079201	0.0676932	6532/51764/246/123745/6571/7166/773/6570	8
hsa00910	hsa00910	Nitrogen metabolism	3/204	17/8145	0.00812318	0.079201	0.0676932	759/765/762	3
hsa04913	hsa04913	Ovarian steroidogenesis	5/204	51/8145	0.00865856	0.0810441	0.0692685	123745/3283/107/108/1081	5
hsa04713	hsa04713	Circadian entrainment	7/204	97/8145	0.010707	0.0943782	0.0806652	51764/810/51806/107/108/51655/116	7
hsa04918	hsa04918	Thyroid hormone synthesis	6/204	75/8145	0.0110115	0.0943782	0.0806652	213/4036/7276/107/108/1081	6
hsa04925	hsa04925	Aldosterone synthesis and secretion	7/204	98/8145	0.0112931	0.0943782	0.0806652	810/3283/51806/3777/107/108/183	7
hsa04934	hsa04934	Cushing syndrome	9/204	155/8145	0.0157273	0.126903	0.108464	8313/3283/3777/107/108/51655/183/3739/7476	9
hsa05033	hsa05033	Nicotine addiction	4/204	40/8145	0.017269	0.133045	0.113714	246213/2557/773/1141	4
hsa04728	hsa04728	Dopaminergic synapse	8/204	132/8145	0.0176256	0.133045	0.113714	51764/810/51806/6571/3800/773/6570/50632	8
hsa04742	hsa04742	Taste transduction	6/204	86/8145	0.0205391	0.150192	0.128369	51764/6338/2557/773/6328/9568	6
hsa00592	hsa00592	alpha-Linolenic acid metabolism	3/204	25/8145	0.0237356	0.164374	0.14049	123745/50487/5319	3
hsa04976	hsa04976	Bile secretion	6/204	89/8145	0.0238834	0.164374	0.14049	6822/1581/10720/343/107/108	6
hsa05032	hsa05032	Morphine addiction	6/204	91/8145	0.026305	0.174392	0.149053	51764/2557/107/773/108/9568	6
hsa04930	hsa04930	Type II diabetes mellitus	4/204	46/8145	0.0274762	0.174392	0.149053	6514/773/6833/9370	4
hsa04970	hsa04970	Salivary secretion	6/204	92/8145	0.0275749	0.174392	0.149053	810/51806/107/108/147/155	6
hsa04912	hsa04912	GnRH signaling pathway	6/204	93/8145	0.0288847	0.177869	0.152025	810/123745/51806/107/108/1081	6
hsa04014	hsa04014	Ras signaling pathway	11/204	235/8145	0.0338934	0.198575	0.169722	51764/810/2249/9965/123745/50487/3481/51806/5319/4804/5063	11
hsa00982	hsa00982	Drug metabolism - cytochrome P450	5/204	72/8145	0.0339444	0.198575	0.169722	10720/2939/131/316/124	5
hsa04750	hsa04750	Inflammatory mediator regulation of TRP channels	6/204	98/8145	0.0360474	0.205734	0.175841	810/123745/51806/107/108/79054	6
hsa04020	hsa04020	Calcium signaling pathway	11/204	240/8145	0.0385899	0.215001	0.183762	810/2249/9965/51806/6869/107/773/108/147/155/887	11
hsa05207	hsa05207	Chemical carcinogenesis - receptor activation	10/204	212/8145	0.0402194	0.218869	0.187067	990/2249/10720/2939/107/10683/773/108/1141/155	10
hsa00980	hsa00980	Metabolism of xenobiotics by cytochrome P450	5/204	78/8145	0.0454997	0.241976	0.206817	6822/10720/2939/131/124	5
hsa00430	hsa00430	Taurine and hypotaurine metabolism	2/204	16/8145	0.0595036	0.307296	0.262647	1036/2572	2
hsa00350	hsa00350	Tyrosine metabolism	3/204	36/8145	0.0604087	0.307296	0.262647	131/316/124	3
hsa04725	hsa04725	Cholinergic synapse	6/204	113/8145	0.0639736	0.309102	0.26419	51764/107/773/108/1141/6572	6
hsa00140	hsa00140	Steroid hormone biosynthesis	4/204	61/8145	0.0660474	0.309102	0.26419	1581/3283/10720/1551	4
hsa00561	hsa00561	Glycerolipid metabolism	4/204	61/8145	0.0660474	0.309102	0.26419	5407/1056/5408/5406	4
hsa00590	hsa00590	Arachidonic acid metabolism	4/204	61/8145	0.0660474	0.309102	0.26419	246/123745/50487/5319	4
hsa00100	hsa00100	Steroid biosynthesis	2/204	20/8145	0.0883246	0.400476	0.342287	8435/1056	2
hsa04611	hsa04611	Platelet activation	6/204	124/8145	0.0907727	0.400476	0.342287	2147/123745/2244/2266/107/108	6
hsa04940	hsa04940	Type I diabetes mellitus	3/204	43/8145	0.09216	0.400476	0.342287	5798/1363/2572	3
hsa05031	hsa05031	Amphetamine addiction	4/204	69/8145	0.094129	0.400476	0.342287	810/51806/6571/6570	4
hsa05204	hsa05204	Chemical carcinogenesis - DNA adducts	4/204	69/8145	0.094129	0.400476	0.342287	6822/10720/2939/1551	4
hsa04024	hsa04024	cAMP signaling pathway	9/204	221/8145	0.103011	0.43044	0.367897	810/51806/107/2641/108/116/9568/1081/7432	9
hsa04916	hsa04916	Melanogenesis	5/204	101/8145	0.109001	0.44748	0.382461	810/51806/107/108/7476	5
hsa04964	hsa04964	Proximal tubule bicarbonate reclamation	2/204	23/8145	0.112095	0.452246	0.386535	762/10991	2
hsa04060	hsa04060	Cytokine-cytokine receptor interaction	11/204	295/8145	0.121614	0.474669	0.4057	6360/653/27189/3605/26525/4804/3952/27178/6366/3623/6363	11
hsa00565	hsa00565	Ether lipid metabolism	3/204	49/8145	0.123752	0.474669	0.4057	123745/50487/5319	3
hsa04022	hsa04022	cGMP-PKG signaling pathway	7/204	167/8145	0.125767	0.474669	0.4057	810/51806/107/3764/108/147/155	7
hsa04310	hsa04310	Wnt signaling pathway	7/204	167/8145	0.125767	0.474669	0.4057	147111/25805/85407/8313/11197/1501/7476	7
hsa04922	hsa04922	Glucagon signaling pathway	5/204	107/8145	0.130319	0.484044	0.413713	810/6514/51806/2641/108	5
hsa04371	hsa04371	Apelin signaling pathway	6/204	139/8145	0.135648	0.494233	0.422422	51764/810/51806/107/108/5346	6
hsa00790	hsa00790	Folate biosynthesis	2/204	26/8145	0.137287	0.494233	0.422422	248/7166	2
hsa00983	hsa00983	Drug metabolism - other enzymes	4/204	80/8145	0.140319	0.497494	0.425208	4353/10720/2939/1807	4
hsa04966	hsa04966	Collecting duct acid secretion	2/204	27/8145	0.145941	0.509705	0.435646	495/496	2
hsa00650	hsa00650	Butanoate metabolism	2/204	28/8145	0.154705	0.532367	0.455014	348158/2572	2
hsa04744	hsa04744	Phototransduction	2/204	29/8145	0.163567	0.549644	0.469781	810/51806	2
hsa04340	hsa04340	Hedgehog signaling pathway	3/204	56/8145	0.16474	0.549644	0.469781	4036/8643/91653	3
hsa04723	hsa04723	Retrograde endocannabinoid signaling	6/204	148/8145	0.166772	0.549644	0.469781	51764/246213/2557/107/773/108	6
hsa04261	hsa04261	Adrenergic signaling in cardiomyocytes	6/204	150/8145	0.174072	0.565734	0.483534	810/51806/107/108/183/147	6
hsa04512	hsa04512	ECM-receptor interaction	4/204	88/8145	0.178546	0.572325	0.489166	1299/1280/9899/7060	4
hsa00410	hsa00410	beta-Alanine metabolism	2/204	31/8145	0.181545	0.574074	0.490662	1807/2572	2
hsa05217	hsa05217	Basal cell carcinoma	3/204	63/8145	0.209093	0.644293	0.550677	8313/8643/7476	3
hsa04657	hsa04657	IL-17 signaling pathway	4/204	94/8145	0.209257	0.644293	0.550677	27189/3605/1673/338324	4
hsa05414	hsa05414	Dilated cardiomyopathy	4/204	96/8145	0.219817	0.668015	0.570953	107/108/183/1674	4
hsa04114	hsa04114	Oocyte meiosis	5/204	131/8145	0.231171	0.693513	0.592746	810/387778/51806/107/108	5
hsa04720	hsa04720	Long-term potentiation	3/204	67/8145	0.235523	0.697626	0.596262	810/51806/107	3
hsa04061	hsa04061	Viral protein interaction with cytokine and cytokine receptor	4/204	100/8145	0.241343	0.705929	0.603358	6360/27178/6366/6363	4
hsa05146	hsa05146	Amoebiasis	4/204	102/8145	0.252285	0.728824	0.622926	731/5275/107/4583	4
hsa04015	hsa04015	Rap1 signaling pathway	7/204	210/8145	0.273672	0.773157	0.660818	810/2249/9965/51806/107/108/4804	7
hsa04216	hsa04216	Ferroptosis	2/204	41/8145	0.274239	0.773157	0.660818	7018/246	2
hsa00380	hsa00380	Tryptophan metabolism	2/204	42/8145	0.283588	0.789995	0.67521	7166/316	2
hsa00071	hsa00071	Fatty acid degradation	2/204	43/8145	0.292926	0.797031	0.681223	131/124	2
hsa00860	hsa00860	Porphyrin metabolism	2/204	43/8145	0.292926	0.797031	0.681223	341208/10720	2
hsa05224	hsa05224	Breast cancer	5/204	147/8145	0.307851	0.817015	0.698303	8313/2249/9965/10683/7476	5
hsa04072	hsa04072	Phospholipase D signaling pathway	5/204	148/8145	0.312784	0.817015	0.698303	2147/123745/107/108/183	5
hsa00730	hsa00730	Thiamine metabolism	1/204	15/8145	0.31669	0.817015	0.698303	248	1
hsa04514	hsa04514	Cell adhesion molecules	5/204	149/8145	0.317728	0.817015	0.698303	149461/9379/1272/57863/9071	5
hsa05226	hsa05226	Gastric cancer	5/204	149/8145	0.317728	0.817015	0.698303	8313/2249/9965/7476/4583	5
hsa00620	hsa00620	Pyruvate metabolism	2/204	47/8145	0.330068	0.839522	0.71754	131/124	2
hsa04921	hsa04921	Oxytocin signaling pathway	5/204	154/8145	0.342578	0.845142	0.722344	810/123745/51806/107/108	5
hsa05030	hsa05030	Cocaine addiction	2/204	49/8145	0.34845	0.845142	0.722344	6571/6570	2
hsa05012	hsa05012	Parkinson disease	8/204	266/8145	0.349533	0.845142	0.722344	7278/810/29986/51806/170712/6571/3800/6570	8
hsa04062	hsa04062	Chemokine signaling pathway	6/204	192/8145	0.349635	0.845142	0.722344	51764/6360/107/108/6366/6363	6
hsa00120	hsa00120	Primary bile acid biosynthesis	1/204	17/8145	0.350554	0.845142	0.722344	1581	1
hsa05202	hsa05202	Transcriptional misregulation in cancer	6/204	193/8145	0.354122	0.845142	0.722344	4353/1991/1671/1670/54738/4804	6
hsa04390	hsa04390	Hippo signaling pathway	5/204	157/8145	0.35756	0.845142	0.722344	174/85407/8313/653/7476	5
hsa05130	hsa05130	Pathogenic Escherichia coli infection	6/204	197/8145	0.372108	0.870732	0.744216	7278/2147/149461/147945/5063/9071	6
hsa04540	hsa04540	Gap junction	3/204	88/8145	0.37932	0.87727	0.749804	7278/107/108	3
hsa00600	hsa00600	Sphingolipid metabolism	2/204	53/8145	0.384675	0.87727	0.749804	339221/204219	2
hsa04211	hsa04211	Longevity regulating pathway	3/204	89/8145	0.386149	0.87727	0.749804	107/108/9370	3
hsa00770	hsa00770	Pantothenate and CoA biosynthesis	1/204	21/8145	0.413351	0.93004	0.794906	1807	1
hsa04330	hsa04330	Notch signaling pathway	2/204	59/8145	0.437292	0.950117	0.812066	11317/10683	2
hsa04614	hsa04614	Renin-angiotensin system	1/204	23/8145	0.442446	0.950117	0.812066	183	1
hsa04730	hsa04730	Long-term depression	2/204	60/8145	0.445828	0.950117	0.812066	123745/773	2
hsa04978	hsa04978	Mineral absorption	2/204	60/8145	0.445828	0.950117	0.812066	7018/341208	2
hsa00564	hsa00564	Glycerophospholipid metabolism	3/204	98/8145	0.446636	0.950117	0.812066	123745/50487/5319	3
hsa01522	hsa01522	Endocrine resistance	3/204	98/8145	0.446636	0.950117	0.812066	107/10683/108	3
hsa04213	hsa04213	Longevity regulating pathway - multiple species	2/204	62/8145	0.462682	0.975383	0.833661	107/108	2
hsa04914	hsa04914	Progesterone-mediated oocyte maturation	3/204	102/8145	0.472779	0.98369	0.840761	387778/107/108	3
hsa04936	hsa04936	Alcoholic liver disease	4/204	142/8145	0.478039	0.98369	0.840761	3605/131/124/9370	4
hsa04929	hsa04929	GnRH secretion	2/204	64/8145	0.479234	0.98369	0.840761	9568/1081	2
hsa04550	hsa04550	Signaling pathways regulating pluripotency of stem cells	4/204	143/8145	0.4835	0.983818	0.84087	8313/1852/7476/3175	4
hsa00010	hsa00010	Glycolysis / Gluconeogenesis	2/204	67/8145	0.50347	0.998974	0.853824	131/124	2
hsa05034	hsa05034	Alcoholism	5/204	187/8145	0.505401	0.998974	0.853824	51764/810/51806/6571/6570	5
hsa04920	hsa04920	Adipocytokine signaling pathway	2/204	69/8145	0.51922	0.998974	0.853824	3952/9370	2
hsa04613	hsa04613	Neutrophil extracellular trap formation	5/204	190/8145	0.51958	0.998974	0.853824	4353/566/1991/2244/2266	5
hsa04917	hsa04917	Prolactin signaling pathway	2/204	70/8145	0.526971	0.998974	0.853824	6514/1081	2
hsa04714	hsa04714	Thermogenesis	6/204	232/8145	0.527058	0.998974	0.853824	170712/107/2641/108/5346/155	6
hsa00053	hsa00053	Ascorbate and aldarate metabolism	1/204	30/8145	0.53342	0.998974	0.853824	10720	1
hsa00630	hsa00630	Glyoxylate and dicarboxylate metabolism	1/204	30/8145	0.53342	0.998974	0.853824	2731	1
hsa05218	hsa05218	Melanoma	2/204	72/8145	0.542217	0.998974	0.853824	2249/9965	2
hsa04215	hsa04215	Apoptosis - multiple species	1/204	32/8145	0.556585	0.998974	0.853824	4804	1
hsa05214	hsa05214	Glioma	2/204	75/8145	0.564444	0.998974	0.853824	810/51806	2
hsa05133	hsa05133	Pertussis	2/204	76/8145	0.57168	0.998974	0.853824	810/51806	2
hsa04722	hsa04722	Neurotrophin signaling pathway	3/204	119/8145	0.576835	0.998974	0.853824	810/51806/4804	3
hsa00040	hsa00040	Pentose and glucuronate interconversions	1/204	34/8145	0.578605	0.998974	0.853824	10720	1
hsa00512	hsa00512	Mucin type O-glycan biosynthesis	1/204	36/8145	0.599537	0.998974	0.853824	50614	1
hsa00760	hsa00760	Nicotinate and nicotinamide metabolism	1/204	36/8145	0.599537	0.998974	0.853824	316	1
hsa04010	hsa04010	MAPK signaling pathway	7/204	294/8145	0.608873	0.998974	0.853824	2249/9965/123745/1852/3481/773/4804	7
hsa00250	hsa00250	Alanine, aspartate and glutamate metabolism	1/204	37/8145	0.609612	0.998974	0.853824	2572	1
hsa04960	hsa04960	Aldosterone-regulated sodium reabsorption	1/204	37/8145	0.609612	0.998974	0.853824	6338	1
hsa05143	hsa05143	African trypanosomiasis	1/204	37/8145	0.609612	0.998974	0.853824	335	1
hsa05225	hsa05225	Hepatocellular carcinoma	4/204	168/8145	0.611167	0.998974	0.853824	8313/2939/3481/7476	4
hsa05340	hsa05340	Primary immunodeficiency	1/204	38/8145	0.619434	0.998974	0.853824	3543	1
hsa05417	hsa05417	Lipid and atherosclerosis	5/204	215/8145	0.630053	0.998974	0.853824	810/335/338/337/51806	5
hsa04926	hsa04926	Relaxin signaling pathway	3/204	129/8145	0.631747	0.998974	0.853824	51764/107/108	3
hsa00260	hsa00260	Glycine, serine and threonine metabolism	1/204	40/8145	0.638347	0.998974	0.853824	2731	1
hsa05219	hsa05219	Bladder cancer	1/204	41/8145	0.647449	0.998974	0.853824	7380	1
hsa00190	hsa00190	Oxidative phosphorylation	3/204	134/8145	0.657299	0.998974	0.853824	495/496/170712	3
hsa05410	hsa05410	Hypertrophic cardiomyopathy	2/204	90/8145	0.663827	0.998974	0.853824	183/1674	2
hsa05322	hsa05322	Systemic lupus erythematosus	3/204	136/8145	0.667159	0.998974	0.853824	1991/731/730	3
hsa04151	hsa04151	PI3K-Akt signaling pathway	8/204	354/8145	0.668069	0.998974	0.853824	51764/1299/2249/9965/1280/3481/4804/7060	8
hsa05163	hsa05163	Human cytomegalovirus infection	5/204	225/8145	0.669716	0.998974	0.853824	51764/810/51806/107/108	5
hsa04962	hsa04962	Vasopressin-regulated water reabsorption	1/204	44/8145	0.673412	0.998974	0.853824	359	1
hsa04658	hsa04658	Th1 and Th2 cell differentiation	2/204	92/8145	0.675611	0.998974	0.853824	11317/10683	2
hsa05418	hsa05418	Fluid shear stress and atherosclerosis	3/204	139/8145	0.681561	0.998974	0.853824	810/2939/51806	3
hsa02010	hsa02010	ABC transporters	1/204	45/8145	0.681636	0.998974	0.853824	6833	1
hsa04621	hsa04621	NOD-like receptor signaling pathway	4/204	184/8145	0.681963	0.998974	0.853824	199713/1671/1673/1670	4
hsa04350	hsa04350	TGF-beta signaling pathway	2/204	94/8145	0.687059	0.998974	0.853824	25805/653	2
hsa05171	hsa05171	Coronavirus disease - COVID-19	5/204	232/8145	0.695781	0.998974	0.853824	2147/2244/731/2266/730	5
hsa00514	hsa00514	Other types of O-glycan biosynthesis	1/204	47/8145	0.697471	0.998974	0.853824	50614	1
hsa04973	hsa04973	Carbohydrate digestion and absorption	1/204	47/8145	0.697471	0.998974	0.853824	6514	1
hsa04070	hsa04070	Phosphatidylinositol signaling system	2/204	97/8145	0.703609	0.998974	0.853824	810/51806	2
hsa00280	hsa00280	Valine, leucine and isoleucine degradation	1/204	48/8145	0.705092	0.998974	0.853824	316	1
hsa05144	hsa05144	Malaria	1/204	50/8145	0.719766	0.998974	0.853824	7060	1
hsa00270	hsa00270	Cysteine and methionine metabolism	1/204	51/8145	0.726828	0.998974	0.853824	1036	1
hsa00330	hsa00330	Arginine and proline metabolism	1/204	51/8145	0.726828	0.998974	0.853824	58510	1
hsa04145	hsa04145	Phagosome	3/204	152/8145	0.738636	0.998974	0.853824	4353/7278/7060	3
hsa04064	hsa04064	NF-kappa B signaling pathway	2/204	104/8145	0.739416	0.998974	0.853824	6366/6363	2
hsa04625	hsa04625	C-type lectin receptor signaling pathway	2/204	104/8145	0.739416	0.998974	0.853824	810/51806	2
hsa05320	hsa05320	Autoimmune thyroid disease	1/204	53/8145	0.740426	0.998974	0.853824	1081	1
hsa04510	hsa04510	Focal adhesion	4/204	201/8145	0.746816	0.998974	0.853824	1299/1280/5063/7060	4
hsa04928	hsa04928	Parathyroid hormone synthesis, secretion and action	2/204	106/8145	0.748948	0.998974	0.853824	107/108	2
hsa04932	hsa04932	Non-alcoholic fatty liver disease	3/204	155/8145	0.7506	0.998974	0.853824	170712/3952/9370	3
hsa05010	hsa05010	Alzheimer disease	8/204	384/8145	0.753026	0.998974	0.853824	7278/8313/810/29986/51806/170712/3800/7476	8
hsa04931	hsa04931	Insulin resistance	2/204	108/8145	0.758181	0.998974	0.853824	6514/183	2
hsa00240	hsa00240	Pyrimidine metabolism	1/204	58/8145	0.771544	0.998974	0.853824	1807	1
hsa00480	hsa00480	Glutathione metabolism	1/204	58/8145	0.771544	0.998974	0.853824	2939	1
hsa05213	hsa05213	Endometrial cancer	1/204	58/8145	0.771544	0.998974	0.853824	8313	1
hsa04370	hsa04370	VEGF signaling pathway	1/204	59/8145	0.777307	0.998974	0.853824	123745	1
hsa05170	hsa05170	Human immunodeficiency virus 1 infection	4/204	212/8145	0.78313	0.998974	0.853824	51764/810/51806/5063	4
hsa04670	hsa04670	Leukocyte transendothelial migration	2/204	114/8145	0.784142	0.998974	0.853824	149461/9071	2
hsa04530	hsa04530	Tight junction	3/204	169/8145	0.800744	0.998974	0.853824	7278/149461/9071	3
hsa04810	hsa04810	Regulation of actin cytoskeleton	4/204	218/8145	0.801138	0.998974	0.853824	2249/2147/9965/5063	4
hsa04935	hsa04935	Growth hormone synthesis, secretion and action	2/204	119/8145	0.803883	0.998974	0.853824	107/108	2
hsa04152	hsa04152	AMPK signaling pathway	2/204	120/8145	0.807635	0.998974	0.853824	3952/9370	2
hsa05321	hsa05321	Inflammatory bowel disease	1/204	65/8145	0.80897	0.998974	0.853824	3605	1
hsa05221	hsa05221	Acute myeloid leukemia	1/204	67/8145	0.818494	0.998974	0.853824	4353	1
hsa05020	hsa05020	Prion disease	5/204	273/8145	0.819853	0.998974	0.853824	7278/731/170712/3800/730	5
hsa04664	hsa04664	Fc epsilon RI signaling pathway	1/204	68/8145	0.823078	0.998974	0.853824	123745	1
hsa05211	hsa05211	Renal cell carcinoma	1/204	69/8145	0.827547	0.998974	0.853824	5063	1
hsa05230	hsa05230	Central carbon metabolism in cancer	1/204	70/8145	0.831903	0.998974	0.853824	6514	1
hsa00230	hsa00230	Purine metabolism	2/204	128/8145	0.835422	0.998974	0.853824	107/108	2
hsa05223	hsa05223	Non-small cell lung cancer	1/204	72/8145	0.840289	0.998974	0.853824	3800	1
hsa05165	hsa05165	Human papillomavirus infection	6/204	331/8145	0.842853	0.998974	0.853824	8313/1299/1280/11317/7060/7476	6
hsa01524	hsa01524	Platinum drug resistance	1/204	73/8145	0.844325	0.998974	0.853824	2939	1
hsa04115	hsa04115	p53 signaling pathway	1/204	73/8145	0.844325	0.998974	0.853824	56475	1
hsa05412	hsa05412	Arrhythmogenic right ventricular cardiomyopathy	1/204	77/8145	0.859479	0.998974	0.853824	1674	1
hsa04910	hsa04910	Insulin signaling pathway	2/204	137/8145	0.862325	0.998974	0.853824	810/51806	2
hsa05167	hsa05167	Kaposi sarcoma-associated herpesvirus infection	3/204	194/8145	0.869359	0.998974	0.853824	51764/810/51806	3
hsa05017	hsa05017	Spinocerebellar ataxia	2/204	143/8145	0.877967	0.998974	0.853824	11317/773	2
hsa04012	hsa04012	ErbB signaling pathway	1/204	85/8145	0.885521	0.998974	0.853824	5063	1
hsa05210	hsa05210	Colorectal cancer	1/204	86/8145	0.888419	0.998974	0.853824	8313	1
hsa04260	hsa04260	Cardiac muscle contraction	1/204	87/8145	0.891243	0.998974	0.853824	170712	1
hsa01240	hsa01240	Biosynthesis of cofactors	2/204	153/8145	0.900452	0.998974	0.853824	248/10720	2
hsa04218	hsa04218	Cellular senescence	2/204	156/8145	0.906409	0.998974	0.853824	810/51806	2
hsa05323	hsa05323	Rheumatoid arthritis	1/204	93/8145	0.906757	0.998974	0.853824	3605	1
hsa05160	hsa05160	Hepatitis C	2/204	157/8145	0.90832	0.998974	0.853824	149461/9071	2
hsa04217	hsa04217	Necroptosis	2/204	159/8145	0.912033	0.998974	0.853824	246/123745	2
hsa04666	hsa04666	Fc gamma R-mediated phagocytosis	1/204	97/8145	0.915855	0.998974	0.853824	123745	1
hsa05215	hsa05215	Prostate cancer	1/204	97/8145	0.915855	0.998974	0.853824	354	1
hsa05022	hsa05022	Pathways of neurodegeneration - multiple diseases	8/204	476/8145	0.916294	0.998974	0.853824	7278/9001/8313/810/51806/170712/3800/7476	8
hsa04630	hsa04630	JAK-STAT signaling pathway	2/204	162/8145	0.91734	0.998974	0.853824	316/3952	2
hsa05231	hsa05231	Choline metabolism in cancer	1/204	98/8145	0.917988	0.998974	0.853824	123745	1
hsa04933	hsa04933	AGE-RAGE signaling pathway in diabetic complications	1/204	100/8145	0.922093	0.998974	0.853824	183	1
hsa05142	hsa05142	Chagas disease	1/204	102/8145	0.925995	0.998974	0.853824	107	1
hsa04660	hsa04660	T cell receptor signaling pathway	1/204	104/8145	0.929701	0.998974	0.853824	5063	1
hsa05164	hsa05164	Influenza A	2/204	171/8145	0.931517	0.998974	0.853824	9407/5644	2
hsa04659	hsa04659	Th17 cell differentiation	1/204	108/8145	0.93657	0.998974	0.853824	3605	1
hsa04066	hsa04066	HIF-1 signaling pathway	1/204	109/8145	0.93818	0.998974	0.853824	7018	1
hsa05152	hsa05152	Tuberculosis	2/204	180/8145	0.943383	0.998974	0.853824	810/51806	2
hsa04360	hsa04360	Axon guidance	2/204	182/8145	0.945741	0.998974	0.853824	91653/5063	2
hsa01200	hsa01200	Carbon metabolism	1/204	115/8145	0.947021	0.998974	0.853824	2731	1
hsa05016	hsa05016	Huntington disease	4/204	306/8145	0.952002	0.998974	0.853824	7278/9001/170712/3800	4
hsa04071	hsa04071	Sphingolipid signaling pathway	1/204	119/8145	0.952204	0.998974	0.853824	204219	1
hsa05132	hsa05132	Salmonella infection	3/204	249/8145	0.952212	0.998974	0.853824	7278/3800/5063	3
hsa04110	hsa04110	Cell cycle	1/204	126/8145	0.960089	0.998974	0.853824	990	1
hsa04380	hsa04380	Osteoclast differentiation	1/204	128/8145	0.962094	0.998974	0.853824	799	1
hsa05415	hsa05415	Diabetic cardiomyopathy	2/204	203/8145	0.965481	0.998974	0.853824	170712/183	2
hsa05205	hsa05205	Proteoglycans in cancer	2/204	205/8145	0.966953	0.998974	0.853824	3481/7476	2
hsa04210	hsa04210	Apoptosis	1/204	136/8145	0.96916	0.998974	0.853824	7278	1
hsa04120	hsa04120	Ubiquitin mediated proteolysis	1/204	142/8145	0.973584	0.998974	0.853824	134111	1
hsa05166	hsa05166	Human T-cell leukemia virus 1 infection	2/204	222/8145	0.977251	0.998974	0.853824	107/108	2
hsa05208	hsa05208	Chemical carcinogenesis - reactive oxygen species	2/204	223/8145	0.977749	0.998974	0.853824	2939/170712	2
hsa04150	hsa04150	mTOR signaling pathway	1/204	156/8145	0.981603	0.998974	0.853824	7476	1
hsa05014	hsa05014	Amyotrophic lateral sclerosis	4/204	364/8145	0.98331	0.998974	0.853824	7278/9001/170712/3800	4
hsa05206	hsa05206	MicroRNAs in cancer	3/204	310/8145	0.985726	0.998974	0.853824	131405/8626/10642	3
hsa04144	hsa04144	Endocytosis	2/204	251/8145	0.988109	0.998974	0.853824	3800/6456	2
hsa05169	hsa05169	Epstein-Barr virus infection	1/204	202/8145	0.994422	0.998974	0.853824	11317	1
hsa05203	hsa05203	Viral carcinogenesis	1/204	204/8145	0.994704	0.998974	0.853824	11317	1
hsa04740	hsa04740	Olfactory transduction	3/204	439/8145	0.999109	0.999109	0.853939	51764/810/51806	3
